# Supplementary material for: Conserved Units of Co-Expression in Bacterial Genomes: An Evolutionary Insight into Transcriptional Regulation
Source: PubMed Central journal article supplement (PMC4873041; doi:10.1371/journal.pone.0155740), 2016-05-19

A

gene x gene co-expression  
considering  $\sigma^{70}$ -operons only

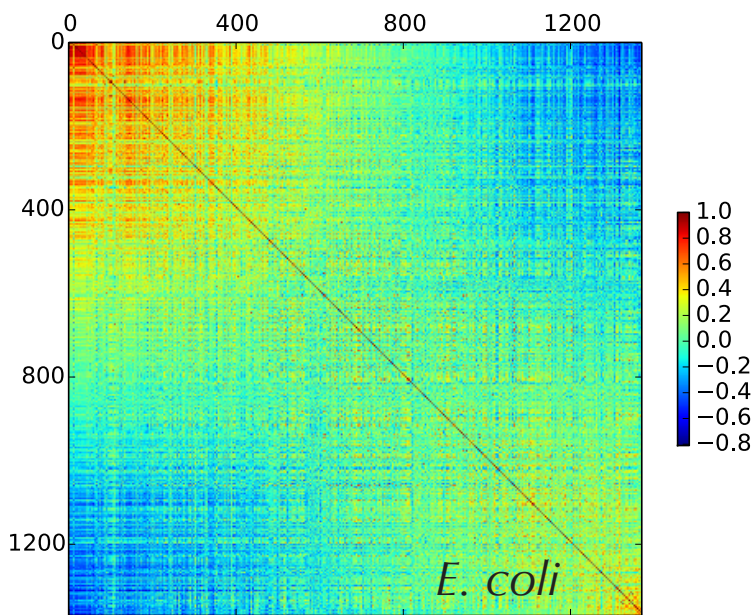

B

inter-operon co-expression

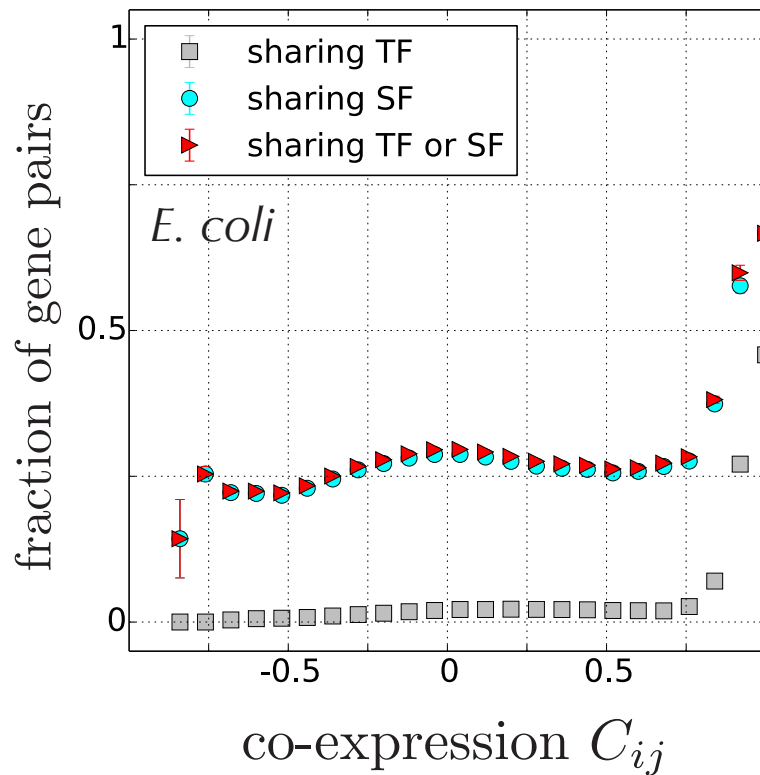

C

inter-operon co-expression

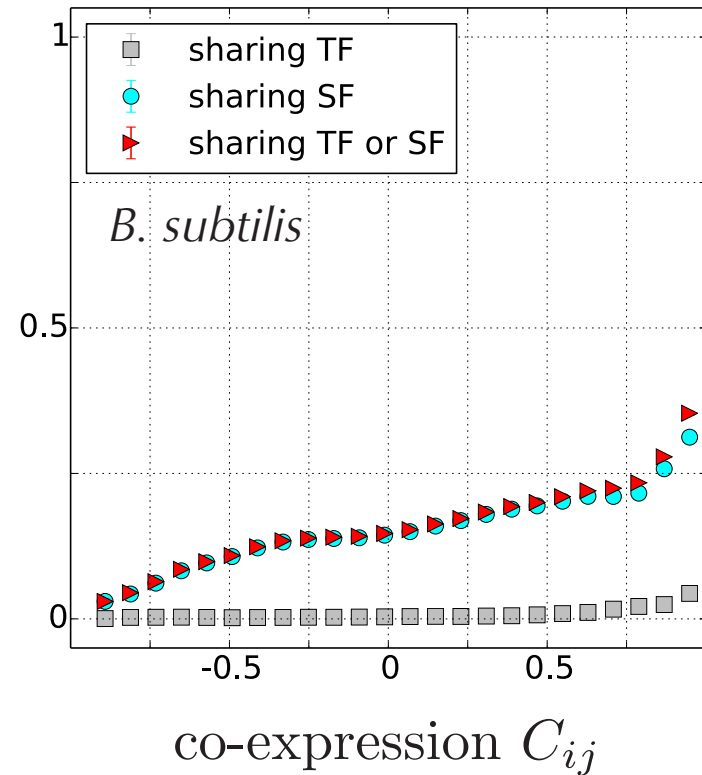

Supplement: pone.0155740.s005.pdf [file pone.0155740.s005.pdf]
