# Supplementary material for: Conserved Units of Co-Expression in Bacterial Genomes: An Evolutionary Insight into Transcriptional Regulation
Source: PubMed Central journal article supplement (PMC4873041; doi:10.1371/journal.pone.0155740), 2016-05-19

(inter-operonic co-expression)

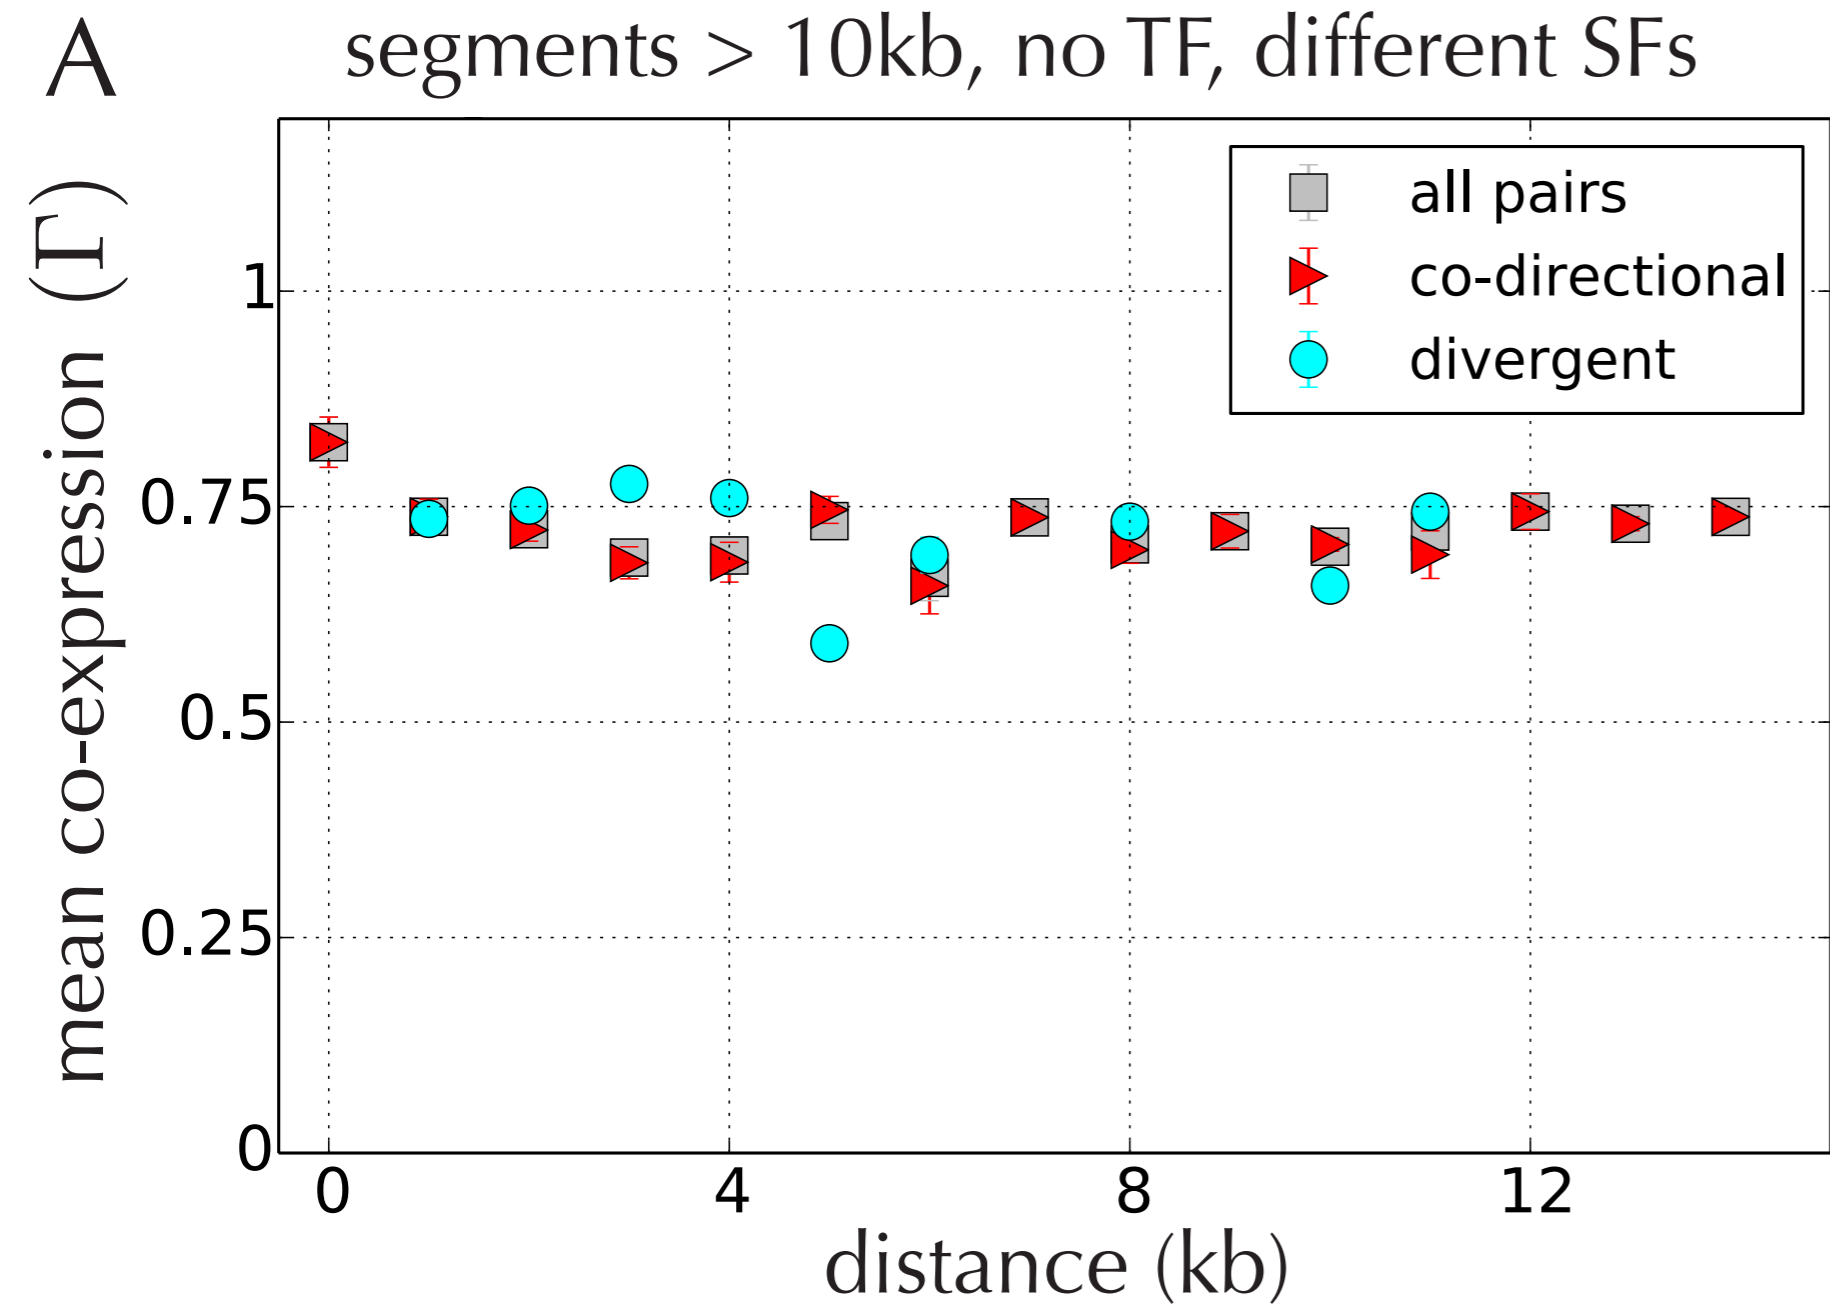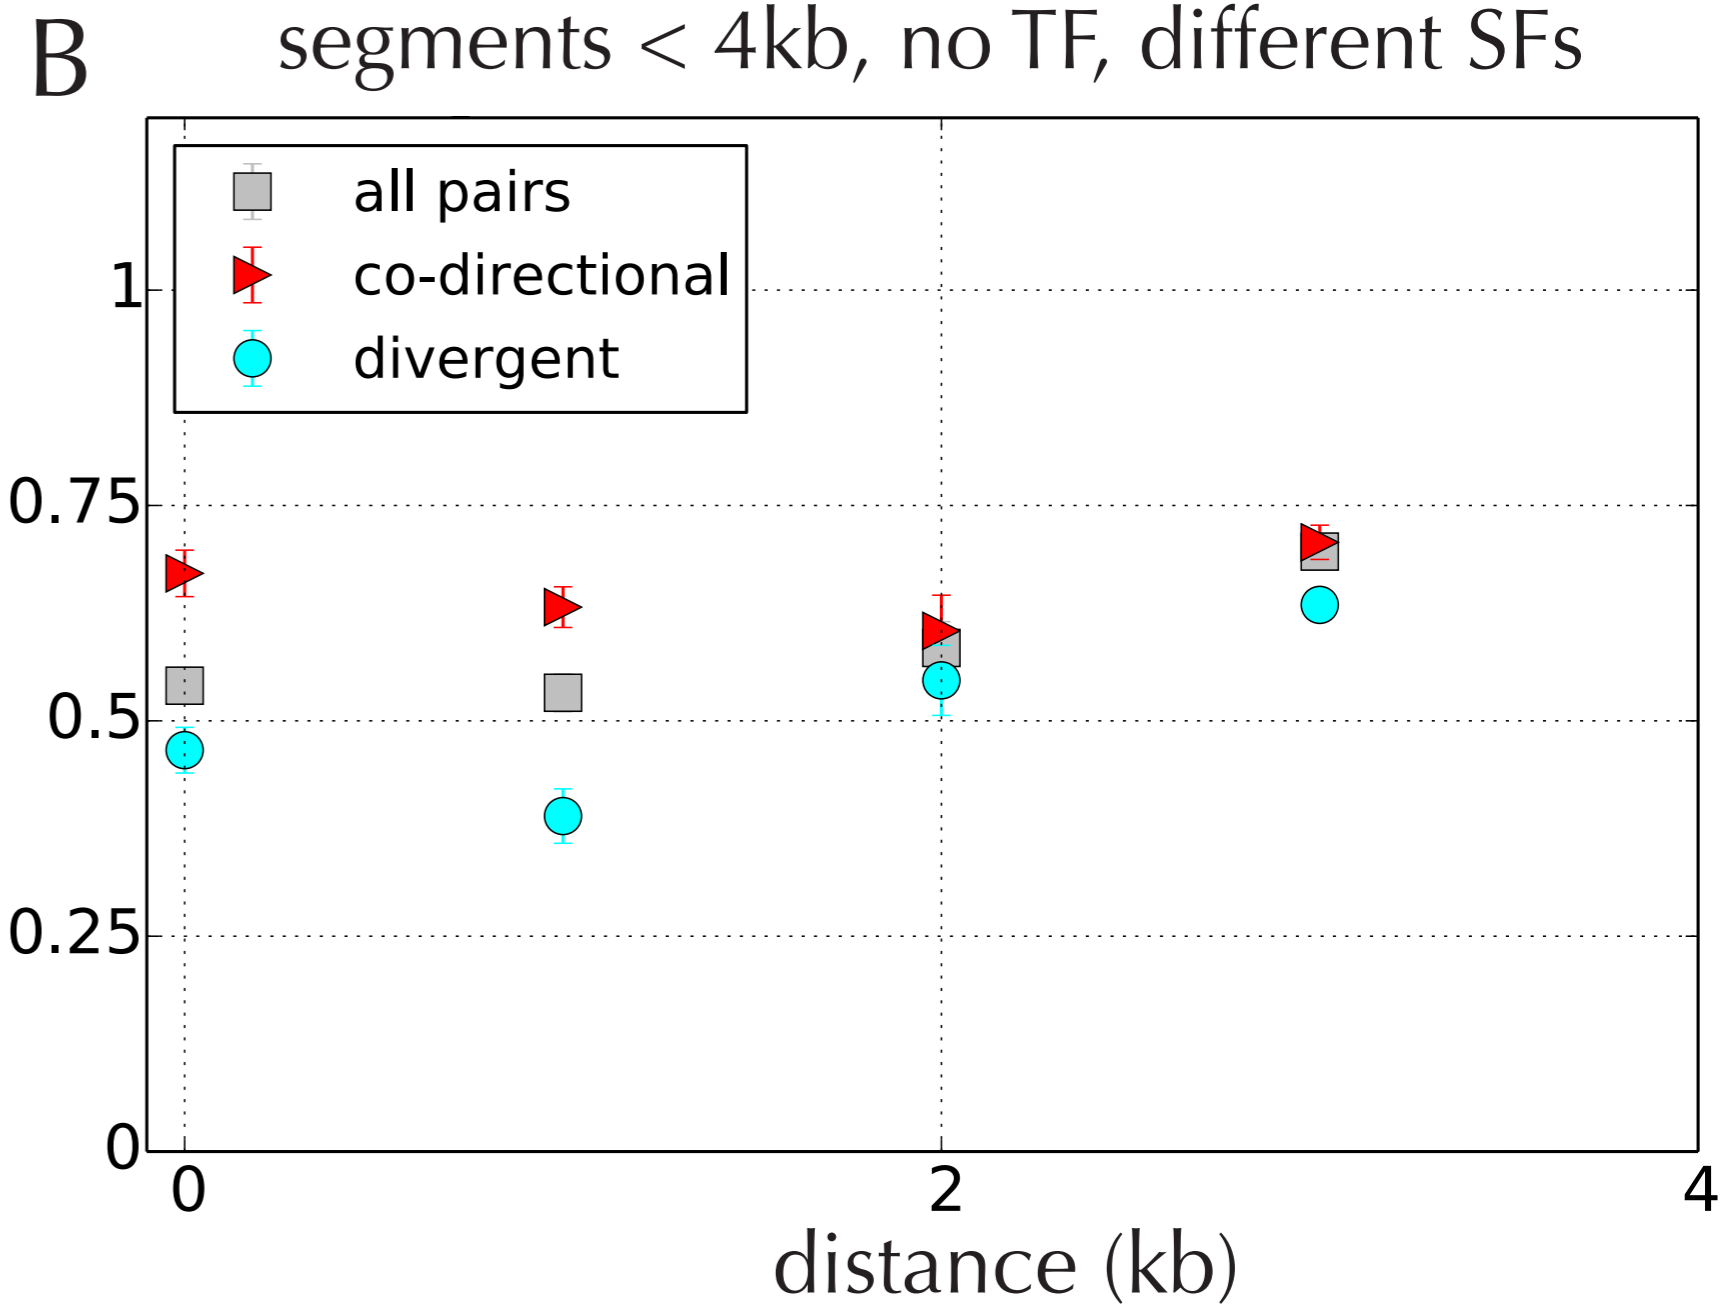

Supplement: pone.0155740.s011.pdf [file pone.0155740.s011.pdf]
