# Supplementary material for: Conserved Units of Co-Expression in Bacterial Genomes: An Evolutionary Insight into Transcriptional Regulation
Source: PubMed Central journal article supplement (PMC4873041; doi:10.1371/journal.pone.0155740), 2016-05-19

A orthologous genes present in both  
*E. coli* and *B. subtilis*

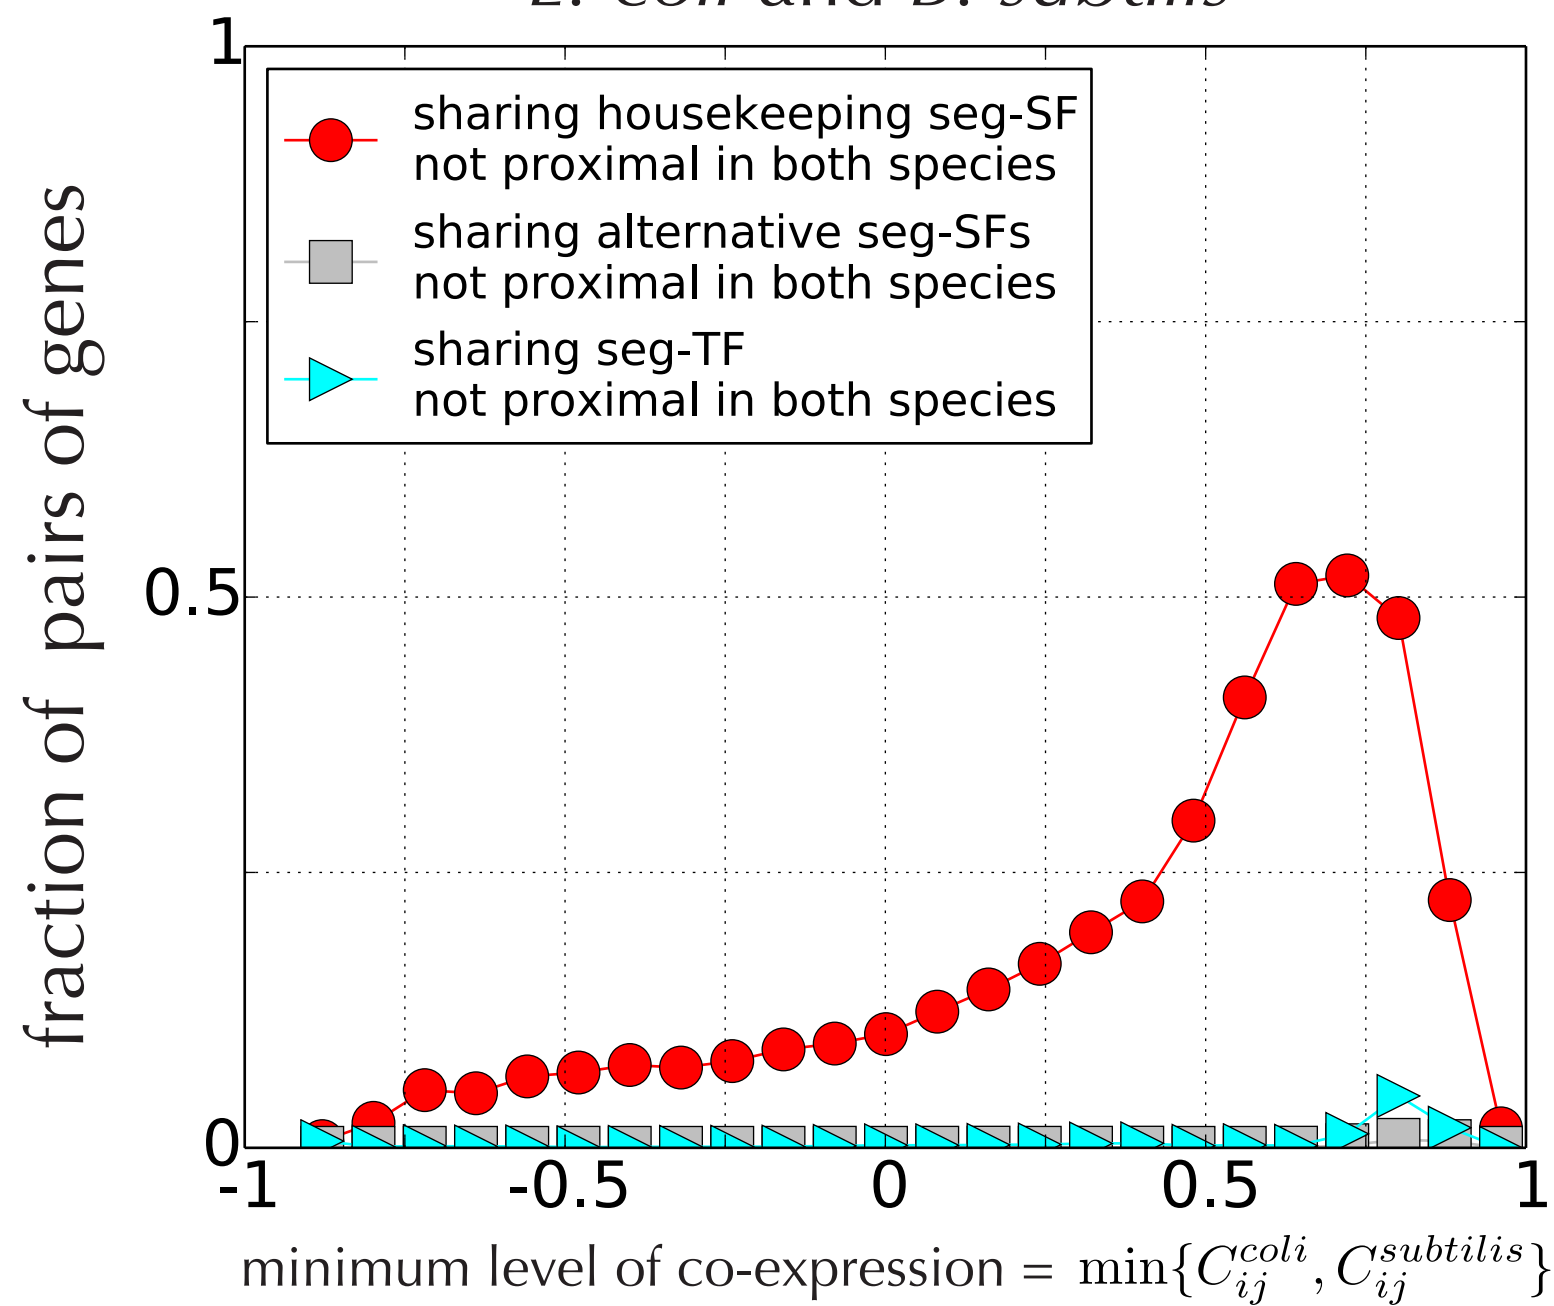

B all genes

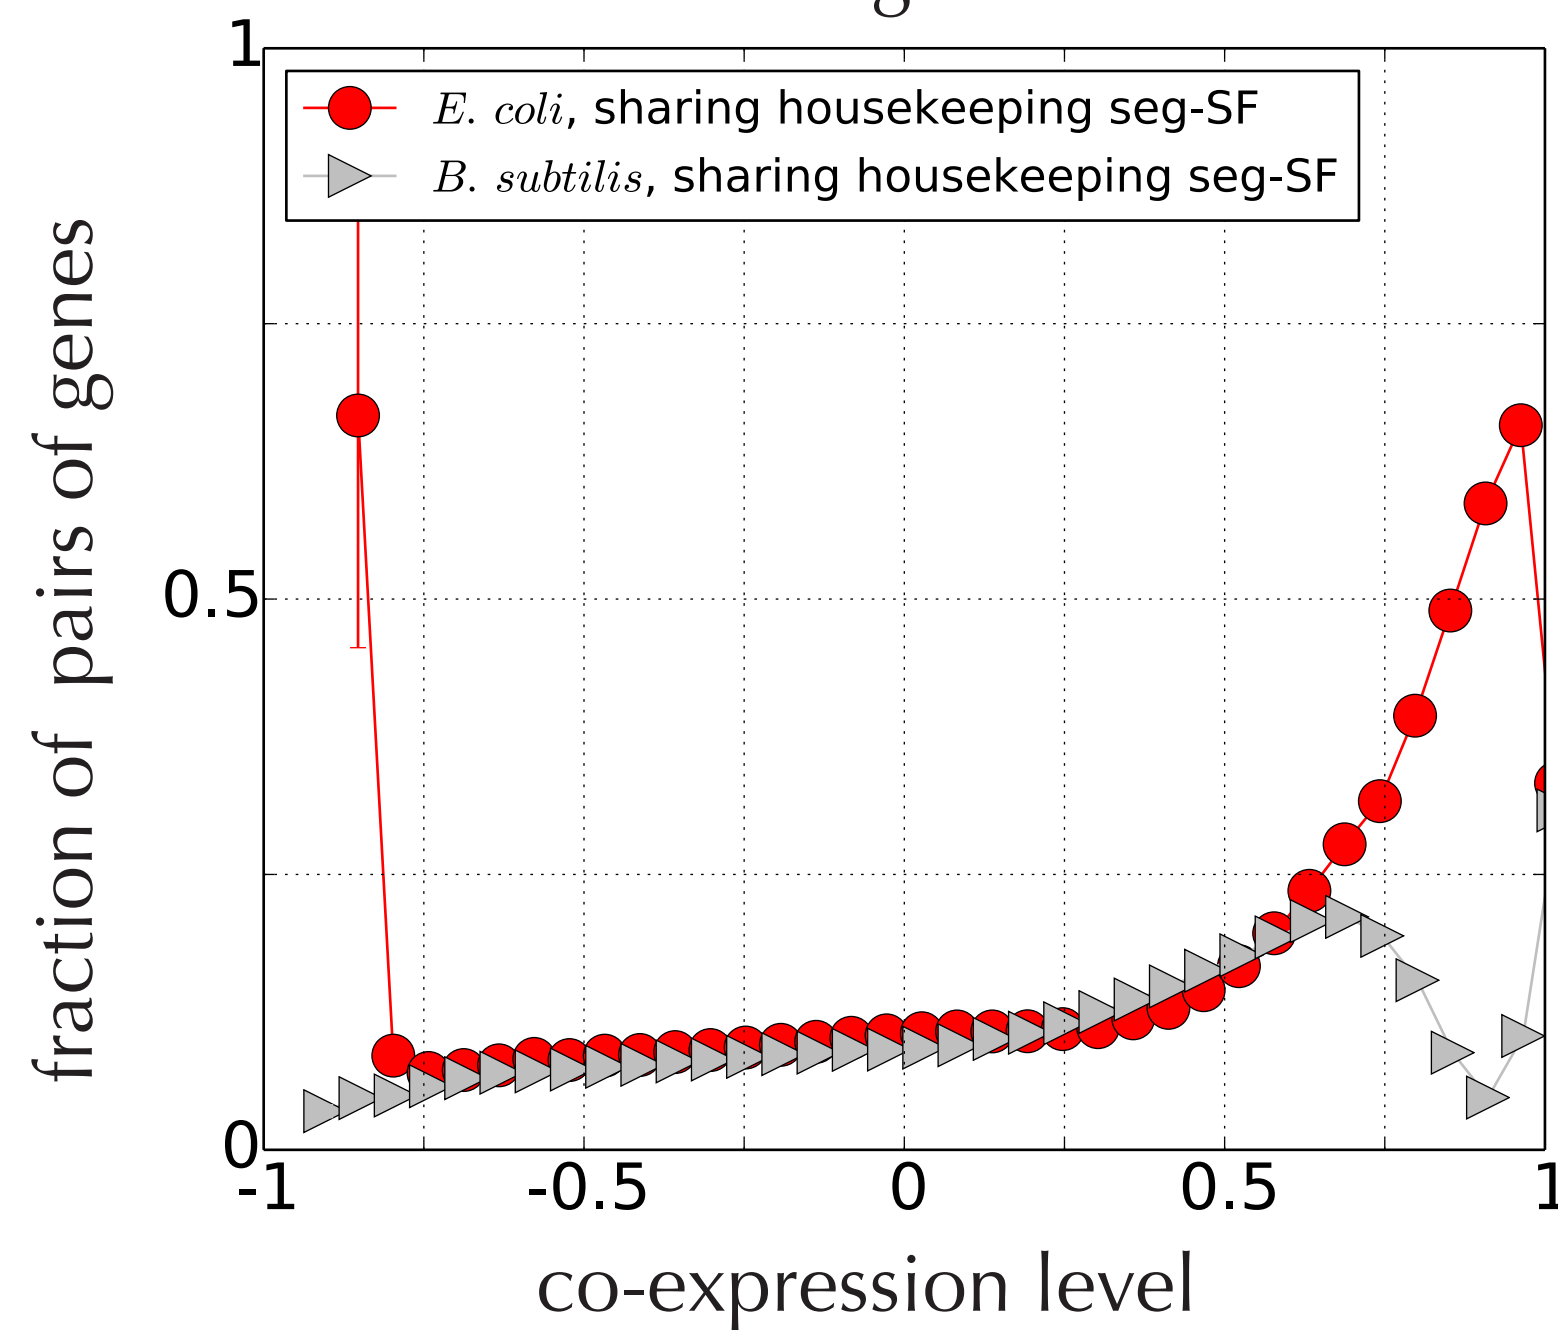

C all genes in synteny segments

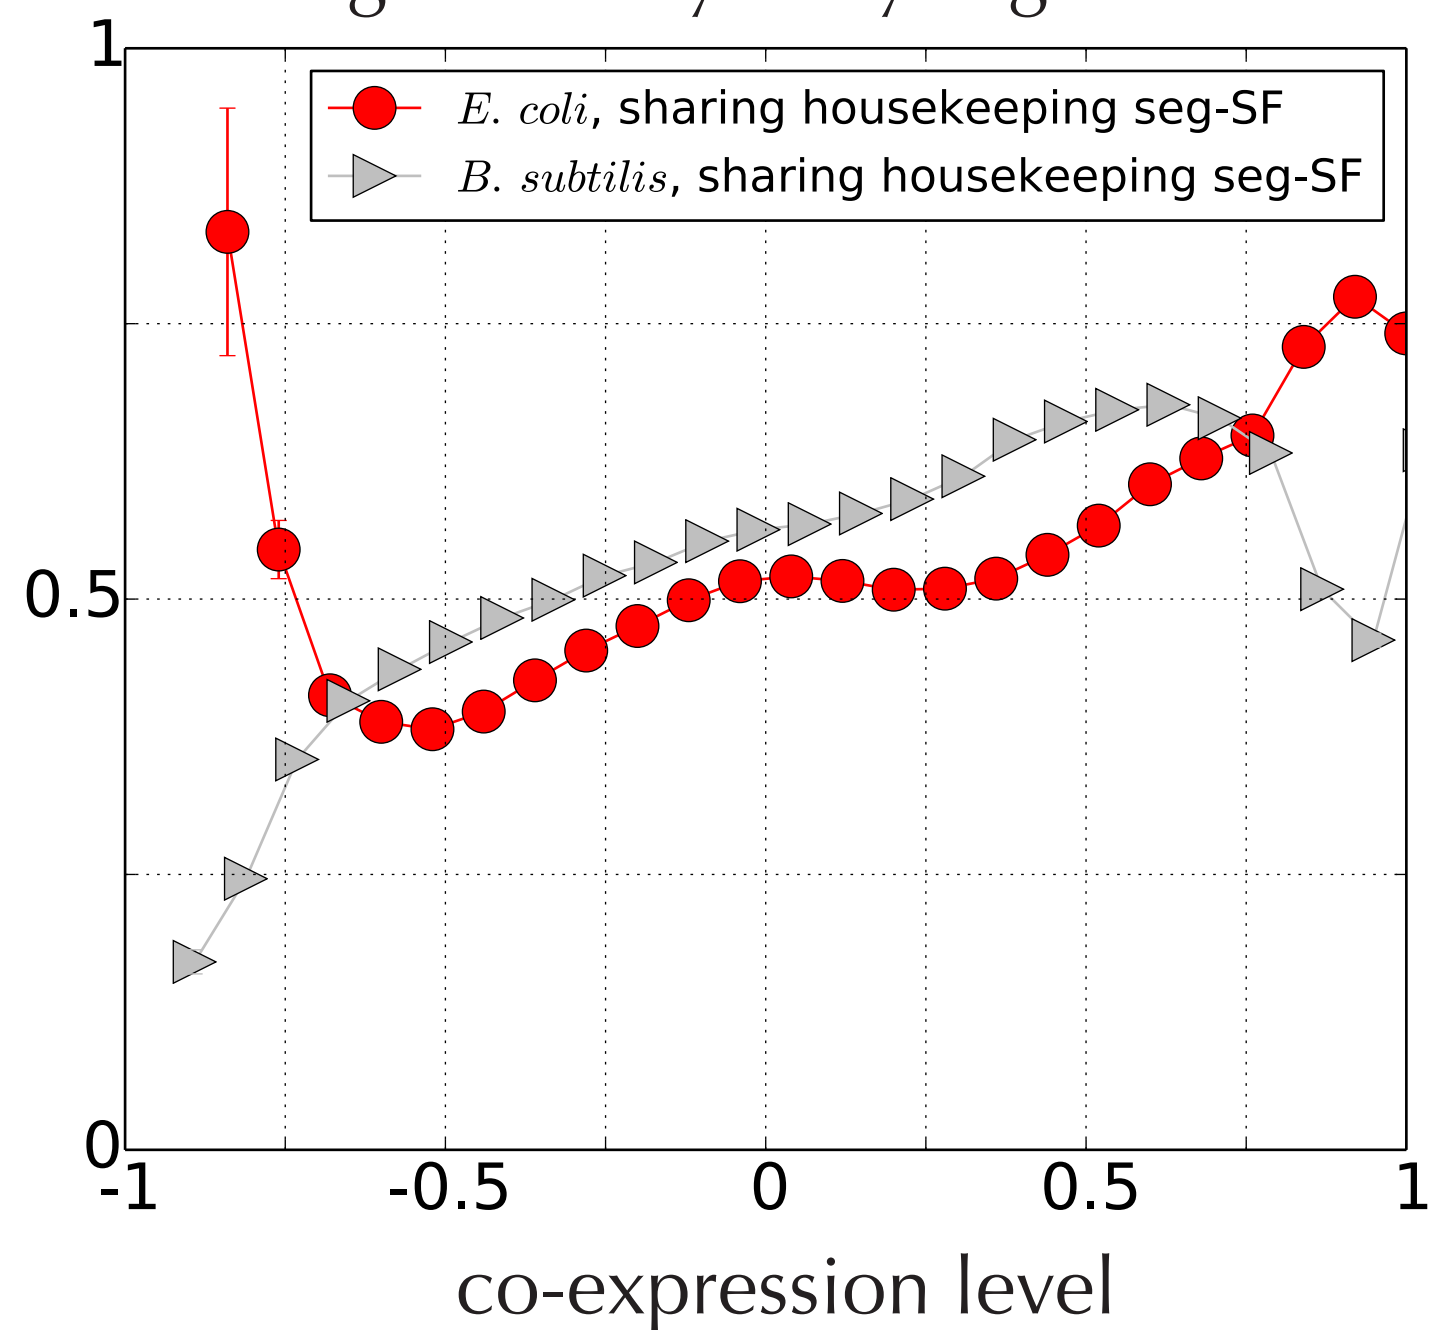

Supplement: pone.0155740.s015.pdf [file pone.0155740.s015.pdf]
